# Supplementary material for: Classification of mechanisms, Climatic Context, Areal Scaling, and Synchronization of floods: the hydroclimatology of floods in the Upper Paraná River Basin, Brazil
Source: Copernicus journal article supplement (doi:10.5194/esd-2017-12), 2017-02-14
Supplement: Supplementary file [file esd-2017-12-AC3-supplement.pdf]

We would like to thank the reviewer for the constructive and thoughtful comments. We will address all the comments in the revised version. Our responses to the comments raised by the reviewer (*underlined and in italic*) are provided below.

*Please provide additional discussion on how the proposed approach help short-term flood forecasting.*

This was discussed along lines 33-35 (page 15) and lines 1-3 (page 16). In the revised version, we will extend the discussion.

*Please provide assumptions and limitations of the proposed approach, mainly due to SOM approach and using ERA-Interim reanalysis datasets.*

The main assumption of this work is stated along lines 28-33 of page 2. The proposed approach is limited by how well the ERA-Interim reanalysis datasets represent the actual atmospheric circulation and ocean SST, but, due to the lack of data in the southern hemisphere, it is hard to evaluate this limitation.

*Clarify “typically of some km<sup>2</sup>” in line 7 of page 3.*

It is in the order of 10-10<sup>2</sup> kilometers.

*Please provide justification or the limitations of using 2.5o x 2.5o resolution ERAInterim reanalysis datasets (moisture fluxes, vorticity, upper level winds and sea surface temperature) in the proposed approach for investigating the basin scale flood mechanisms.*

At this stage we are more interested in finding general large-scale patterns of atmospheric circulation and SST anomalies associated with extreme floods in the UPRB. For this reason, we believe that such resolution provides satisfactory results.
